# Supplementary material for: The circadian variation of amino acids and melatonin in human milk and their potential sleep–wake regulation
Source: Royal Society of Chemistry journal article supplement (doi:10.1039/d5fo03369a), 2025-01-01
Supplement: d5fo03369a1.pdf [file d5fo03369a1.pdf]

# 1 Electronic Supplementary Material (ESI) for Food & Function

## 2 Supplementary Figures

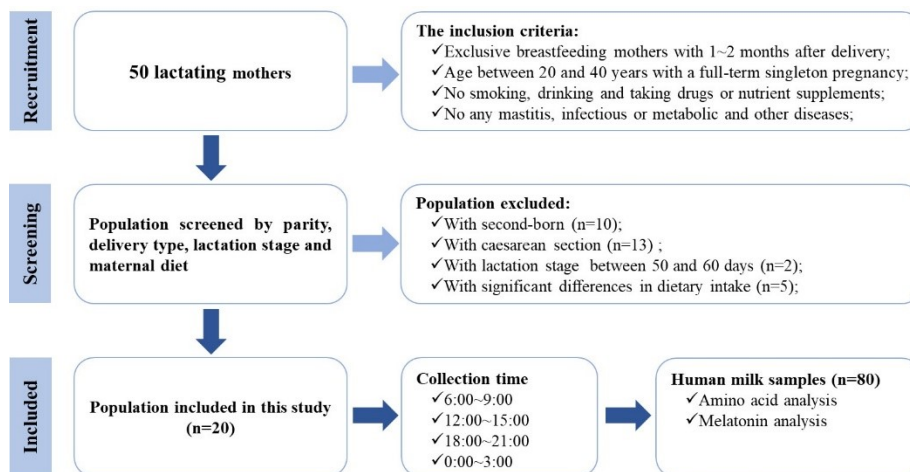

Figure S1. Study protocol flowchart.

## 5 Supplementary Tables

6 **Table S1** Diets and characteristics of study participants

| Variable                          | Total<br>(N=20) | Male<br>(N=10) | Female<br>(N=10) | P-Value |
|-----------------------------------|-----------------|----------------|------------------|---------|
| Basic information                 |                 |                |                  |         |
| Maternal age (years)              | 28.50±2.46      | 28.30 ±2.11    | 28.70±2.87       | 0.481   |
| Maternal BMI (kg/m <sup>2</sup> ) | 23.68±2.44      | 22.68±2.68     | 24.68±1.78       | 0.054   |
| Gestational age (weeks)           | 39.77±1.04      | 39.46 ±1.00    | 40.09± 1.04      | 0.165   |
| Delivery type (vaginal delivery%) | 100%            | 100.00%        | 100.00%          | ——      |
| Parity (firstborn%)               | 100%            | 100.00%        | 100.00%          | ——      |
| Lactation stage (days)            | 31.20±2.07      | 30.70±1.64     | 31.70±2.41       | 0.436   |
| Birth weight of infants (kg)      | 3.34±0.28       | 3.41±0.30      | 3.28±0.25        | 0.29    |
| Current weight of infants (kg)    | 4.59±0.37       | 4.76±0.36      | 4.41±0.29        | 0.063   |
| Diet (24h dietary review)         |                 |                |                  |         |
| Energy intake (kcal/day)          | 1820.4±88.01    | 1806.5±75.89   | 1834.3±100.82    | 0.495   |
| Protein intake (g/day)            | 76.42±5.39      | 77.73±5.31     | 75.11±5.42       | 0.289   |
| Fat intake (g/day)                | 61.58±8.89      | 59.72±6.56     | 63.44±10.78      | 0.364   |
| Carbohydrates intake (g/day)      | 246.02±11.85    | 245.39±11.55   | 246.65±12.74     | 0.819   |
| Dietary fiber intake (g/day)      | 13.41±1.65      | 13.38±1.27     | 13.43±2.03       | 0.948   |
| Vitamin A intake (μg/day)         | 550.37±264.5    | 597.15±355.48  | 503.58±128.32    | 0.444   |
| Vitamin E intake (mg/day)         | 16.76±2.61      | 16.93±1.99     | 16.59±3.22       | 0.779   |
| Vitamin B1 intake (mg/day)        | 0.85±0.14       | 0.83±0.13      | 0.86±0.16        | 0.652   |
| Vitamin B2 intake (mg/day)        | 1.1±0.16        | 1.12±0.14      | 1.07±0.19        | 0.51    |
| Vitamin B6 intake (mg/day)        | 0.71±0.23       | 0.67±0.24      | 0.74±0.22        | 0.508   |
| Vitamin B9 intake (μg/day)        | 230.35±67.32    | 245.6±64.68    | 215.09±69.77     | 0.324   |
| Vitamin B12 intake (μg/day)       | 2.51±1.21       | 2.76±1.49      | 2.25±0.84        | 0.359   |
| Vitamin C intake (mg/day)         | 76.03±36.21     | 80.57±37.16    | 71.48±36.61      | 0.588   |
| Vitamin D intake (μg/day)         | 3.57±0.85       | 3.29±0.6       | 3.85±0.99        | 0.145   |
| Ca intake (mg/day)                | 566.34±88.2     | 584.9±88.4     | 547.77±88.54     | 0.36    |
| Na intake (mg/day)                | 2384.77±488.36  | 2477.65±529.73 | 2291.89±451.33   | 0.41    |
| Fe intake (mg/day)                | 16.34±1.89      | 16.96±1.85     | 15.72±1.81       | 0.147   |
| K intake (mg/day)                 | 2005.36±179.24  | 1998.66±163.23 | 2012.06±202.69   | 0.872   |
| Zn intake (mg/day)                | 9.39±1.13       | 9.72±1.08      | 9.06±1.14        | 0.201   |
| Cu intake (mg/day)                | 1.68±0.32       | 1.66±0.34      | 1.7±0.3          | 0.785   |
| I intake (μg/day)                 | 120.57±14.83    | 125.54±18.76   | 115.6±7.59       | 0.138   |
| Se intake (μg/day)                | 49.82±10.72     | 49.33±13.97    | 50.3±6.86        | 0.846   |

8 **Table S2** Dose translation from mouse to human

| Animal dose          | Equivalent dose of one-month-old infant with body weight of 4.5 kg | Human milk concentration calculated based on 4.5 kg infant consuming 700 mL human milk in one day |
|----------------------|--------------------------------------------------------------------|---------------------------------------------------------------------------------------------------|
| 250 mg/kg histidine  | 55 mg/kg histidine                                                 | 0.35 mg/ml histidine                                                                              |
| 500 mg/kg histidine  | 110 mg/kg histidine                                                | 0.71 mg/ml histidine                                                                              |
| 400 mg/kg tyrosine   | 88 mg/kg tyrosine                                                  | 0.57 mg/ml tyrosine                                                                               |
| 800 mg/kg tyrosine   | 176 mg/kg tyrosine                                                 | 1.13 mg/ml tyrosine                                                                               |
| 150 mg/kg tryptophan | 33 mg/kg tryptophan                                                | 0.21 mg/ml tryptophan                                                                             |
| 300 mg/kg tryptophan | 66 mg/kg tryptophan                                                | 0.42 mg/ml tryptophan                                                                             |
| 15 mg/kg melatonin   | 3.3 mg/kg melatonin                                                | 0.02 mg/ml melatonin                                                                              |
| 30 mg/kg melatonin   | 6.6 mg/kg melatonin                                                | 0.04 mg/ml melatonin                                                                              |

9 According to the dosage problem of pharmacological experiment design, the dosage from mice  
10 to humans can be converted into the following formula:  $D_b' = D_a' \times S_a \times R_{ab} \times S_b$ , where  $D_a'$  and  $D_b'$   
11 are the dose of non-standard body weight,  $S_a$  and  $S_b$  are the correction factor for non-standard  
12 weight animals and  $R_{ab}$  is the conversion coefficient. It is known that the conversion coefficient  
13 from mice to human ( $R_{ab}$ ) is 0.081, the correction factor for non-standard weight mice ( $S_a$ ) is 1.145,  
14 the correction factor for non-standard weight infant ( $S_b$ ) is 2.37. According to the formula, when the  
15 gavage dose of 30 g mice is 250 or 500 mg/kg histidine, the intake dose of 4.5 kg infant is 55 mg/kg  
16 and 110 mg/kg histidine. When the gavage dose of 30 g mice is 400 or 800 mg/kg tyrosine, the  
17 intake dose of 4.5 kg infant is 88 mg/kg and 176 mg/kg tyrosine. When the gavage dose of 30 g  
18 mice is 150 or 300 mg/kg tryptophan, the intake dose of 4.5 kg infant is 33 mg/kg and 66 mg/kg  
19 tryptophan. When the gavage dose of 30 g mice is 15 or 30 mg/kg melatonin, the intake dose of 4.5  
20 kg infant is 3.3 mg/kg and 6.6 mg/kg melatonin.

21 Reference: Wei Wei, Wu Ximei, Li Yuanjian, et al. Experimental Methodology of Pharmacological  
22 (Fourth Edition)[M]. Beijing: People's Medical Publishing House, 2010: 69-72.
